# Supplementary material for: Removal of Cu2+ from wastewater by modified xanthan gum (XG) with ethylenediamine (EDA)
Source: Royal Society of Chemistry journal article supplement (doi:10.1039/c6ra11423g), 2016-01-01
Supplement: c6ra11423g1.pdf [file c6ra11423g1.pdf]

## Supporting information:

### Figure and Table captions:

Fig. S1 SEM images of XG (a), XG-Cl (b), XG-NH<sub>2</sub> (c) and XG-NH<sub>2</sub> loaded by Cu<sup>2+</sup> (d)

Fig. S2 Effect of contact time on the removal of Cu<sup>2+</sup> (a), the pseudo-first-order kinetic model (b), the pseudo-second-order kinetic model (c), and intra-particle diffusion plots (d) for Cu<sup>2+</sup> adsorption by XG-NH<sub>2</sub>.

Fig. S3 Adsorption isotherm of Cu<sup>2+</sup> adsorption (a), Langmuir (b) and Freundlich (c) adsorption isotherm for Cu<sup>2+</sup> adsorption by XG-NH<sub>2</sub>.

Table S1 The parameters of different kinetic model

Table S2 Langmuir and Freundlich isotherm parameters

Table S3 The adsorption capacity of different divalent cations by XG-NH<sub>2</sub>

### Figures:

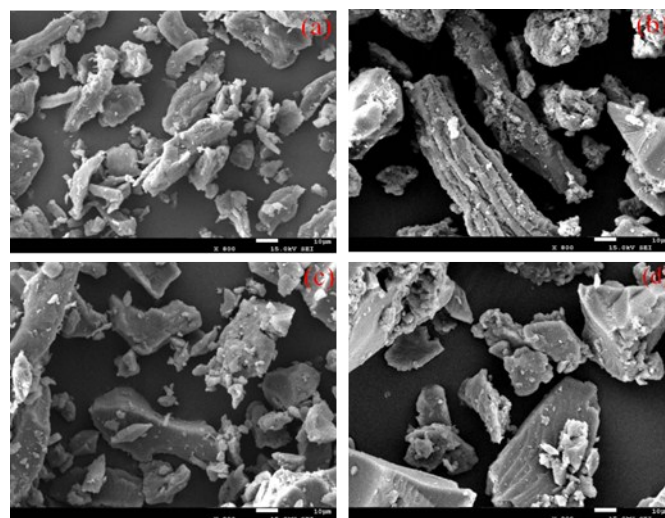

Fig. S1 SEM images of XG (a), XG-Cl (b), XG-NH<sub>2</sub> (c) and XG-NH<sub>2</sub> loaded by Cu<sup>2+</sup> (d)

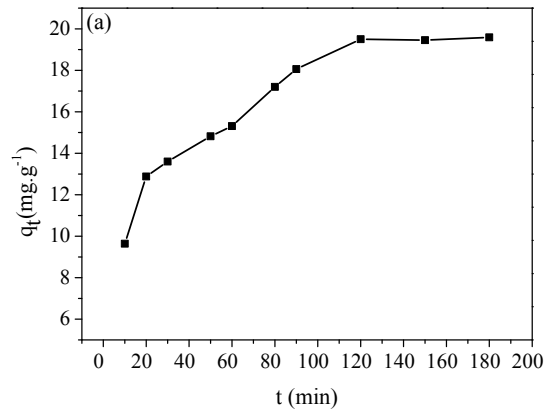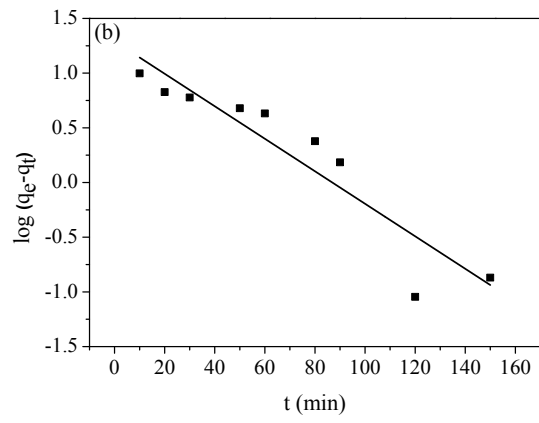

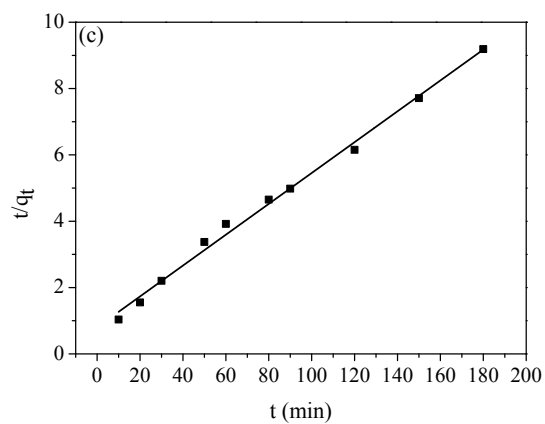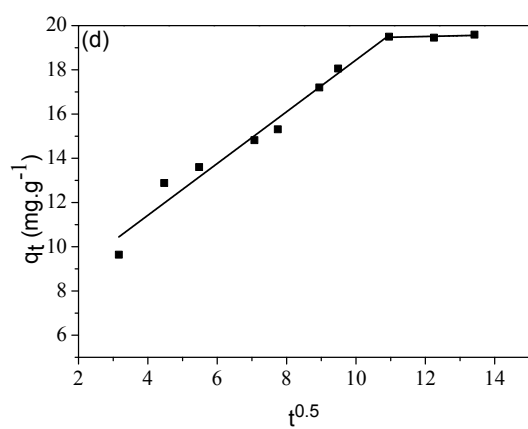

Fig. S2 Effect of contact time on the removal of Cu<sup>2+</sup> (a), the pseudo-first-order kinetic model (b), the pseudo-second-order kinetic model (c), and intra-particle diffusion plots (d) for Cu<sup>2+</sup> adsorption by XG-NH<sub>2</sub>.

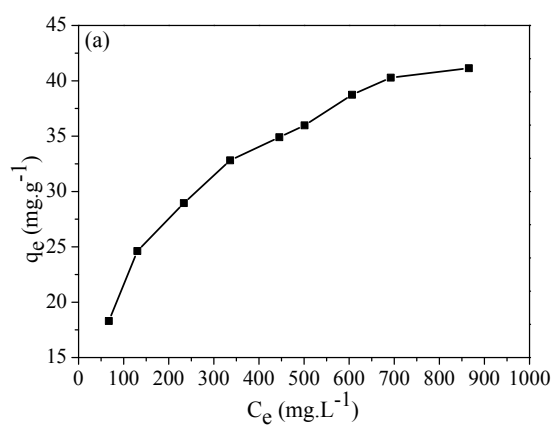

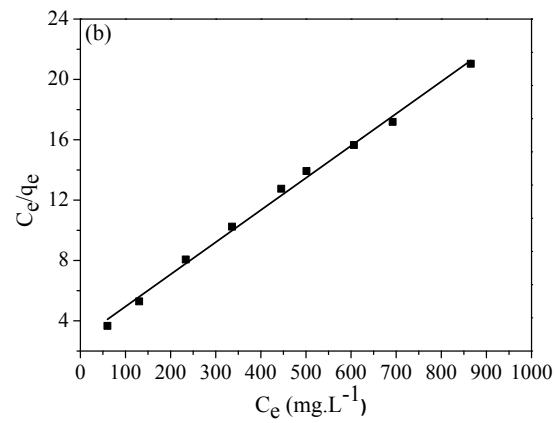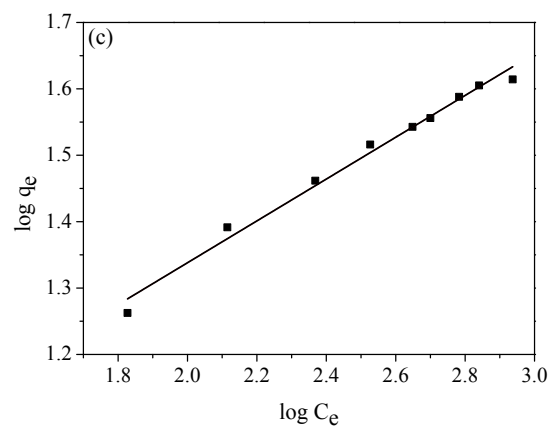

Fig. S3 Adsorption isotherm of  $\text{Cu}^{2+}$  adsorption (a), Langmuir (b) and Freundlich (c) adsorption isotherm for  $\text{Cu}^{2+}$  adsorption by XG- $\text{NH}_2$

### Tables:

Table S1 The parameters of different kinetic model

| pseudo-first order                                         | pseudo-second order                                                   | Intra-particle diffusion                                         |
|------------------------------------------------------------|-----------------------------------------------------------------------|------------------------------------------------------------------|
| $q_{e, \text{exp}} = 19.59 \text{ mg} \cdot \text{g}^{-1}$ |                                                                       |                                                                  |
| $q_{e, \text{cal}} = 19.57 \text{ mg} \cdot \text{g}^{-1}$ | $q_{e, \text{cal}} = 21.50 \text{ mg} \cdot \text{g}^{-1}$            |                                                                  |
| $R^2 = 0.855$                                              | $R^2 = 0.994$                                                         | $R^2 = 0.967$                                                    |
| $k_1 = 0.03422 \text{ min}^{-1}$                           | $k_2 = 0.002163 \text{ g} \cdot \text{mg}^{-1} \cdot \text{min}^{-1}$ | $kp = 1.170 \text{ mg} \cdot \text{h}^{0.5} \cdot \text{g}^{-1}$ |

Table S2 Langmuir and Freundlich isotherm parameters

| Langmuir adsorption | Freundlich adsorption isotherm |
|---------------------|--------------------------------|
| isotherm            |                                |

| $q_{\max}(\text{mg}\cdot\text{g}^{-1})$ | $b(\text{L}\cdot\text{mg}^{-1})$ | $R^2$ | $R_L$ | n     | $K_f(\text{mg}\cdot\text{g}^{-1})$ | $R^2$ |
|-----------------------------------------|----------------------------------|-------|-------|-------|------------------------------------|-------|
| 46.95                                   | 132.4                            | 0.996 | 0-1   | 3.176 | 5.107                              | 0.986 |

Table S3 The adsorption capacity of different divalent cations by XG-NH<sub>2</sub>

| Divalent cation                            | Cu <sup>2+</sup> | Pb <sup>2+</sup> | Cd <sup>2+</sup> | Ni <sup>2+</sup> | Zn <sup>2+</sup> | Co <sup>2+</sup> | Ca <sup>2+</sup> |
|--------------------------------------------|------------------|------------------|------------------|------------------|------------------|------------------|------------------|
| Adsorption capacity (mg. g <sup>-1</sup> ) | 20.22            | 11.07            | 9.192            | 6.393            | 4.030            | 2.472            | 1.883            |
